# Supplementary material
Source: Research Square preprint supplement (doi:10.21203/rs.3.rs-9669958/v1)
Supplement: Supplementary file 1 [file 9f8c5deec7730402bff9a655.docx]

Supplementary Table 1. List of all recorded variables, their full names, R code names, and decisions regarding inclusion in the final models after multicollinearity check (VIF and correlation analysis).

| № | Full variable name (English) | R code name (snake_case) | Included in final models? | Reason for exclusion / inclusion |
| --- | --- | --- | --- | --- |
| 1 | Date | date | No | Not used in modeling |
| 2 | Colony ID | colony_id | Yes (random effect) | Used as grouping factor |
| 3 | Coordinate 1 (latitude) | coordinate_1 | No | Spatial reference only |
| 4 | Coordinate 2 (longitude) | coordinate_2 | No | Spatial reference only |
| 5 | Location | location | No | Descriptive only |
| 6 | Air temperature | temperature | Yes | Retained (safe set) |
| 7 | Air humidity | humidity | Yes | Retained (safe set) |
| 8 | Tree ID | tree_id | No | Identifier |
| 9 | Tree species | tree_species | Yes | Retained (categorical) |
| 10 | Tree type (host / forage) | tree_type | Yes | Retained (categorical) |
| 11 | Distance from tree to forest edge | distance_from_tree_to_forest_edge | Yes | Retained (safe set) |
| 12 | Tree diameter (DBH) | diameter | Yes | Retained (core variable) |
| 13 | Tree height | height | No | High collinearity with diameter |
| 14 | Bark type (smoothness score) | bark_type | No | High collinearity with diameter |
| 15 | Number of hollows | hollows_number | Yes | Retained (safe set) |
| 16 | Dead branches, % | dead_branches | Yes | Retained (safe set) |
| 17 | Crown covering, % | crown_covering | No | Redundant with other crown variables |
| 18 | Crown foliage (health by Roloff (2016) classification) | crown_foliage / health_by_rid | No | High collinearity with dead branches |
| 19 | Moss cover, % | moss | Yes | Retained (safe set) |
| 20 | Lichen cover, % | lichen | No | Moderate collinearity |
| 21 | Distance from tree to nest | distance_from_tree_to_nest | No | High collinearity with other distance variables |
| 22 | Distance to nearest tree | distance_from_tree_to_nearest_tree | No | Not biologically critical |
| 23 | Soil cover, % | soil | No | Perfect collinearity with forest litter |
| 24 | Forest litter cover, % | forest_litter | No | Perfect collinearity with soil (r = –1) |
| 25 | Total number of trails | total_trails | No | Used only descriptively |
| 26 | Trail ID | trail_id | No | Identifier |
| 27 | Trail length, m | trail_length_m | No | Descriptive only |
| 28 | Trail width, cm | trail_width_cm | No | Descriptive only |
| 29 | Trail on litter, % | trail_on_litter | No | Descriptive only |
| 30 | Trail on soil, % | trail_on_soil | No | Descriptive only |
| 31 | Trail on logs and branches, % | trail_on_logs_and_branchs | No | Descriptive only |
| 32 | Number of ants on trail / 1 min | number_of_ants_on_trail_1_min | Yes (response) | Main response variable |
| 33 | Number of ants on tree / 1 min | number_of_ants_on_tree_1_min | No | Secondary response |
| 34 | % of workers with full goiter | percent_of_workers_on_the_trail_with_a_full_goiter | Yes (response) | Main response variable |
| 35 | Total trees by colony | total_trees_by_colony | No | Descriptive only |
| 36 | Tree species per colony | tree_species_per_colony | No | Descriptive only |

A total of 36 variables were initially recorded. After checking for multicollinearity (Pearson correlations and Variance Inflation Factors), 14 variables with high collinearity (VIF > 5 or r ≈ ±1) or low biological relevance were excluded. The final “safe” set used in Random Forest and GLMM models included 8–9 predictors plus categorical variables (tree_species and tree_type). Response variables were % of workers with full goiter and number of ants on trail / 1 min.

Supplementary Table S2. Correlations (Spearman) of trail characteristics with ant activity

| Parameter | ρ | p-value |
| --- | --- | --- |
| Trail length | 0.339 | 0.012 |
| Trail width | 0.766 | <0.001 |
| % litter on trail | 0.079 | 0.42 |
| % soil on trail | –0.345 | 0.008 |
| % logs/branches on trail | 0.274 | 0.012 |

Supplementary Table S3. Ant activity on trails: host trees vs. forage trees (N = 139)

| Tree type | n | Median ants/1 min | Mean ants/1 min | SD |
| --- | --- | --- | --- | --- |
| Forage | 92 | 124 | 147 | 120 |
| Host | 47 | 125 | 160 | 114 |

Wilcoxon rank-sum test: W = 1985.5, p = 0.4332 (нет значимых различий).

Supplementary Table S4. Full GLMM results (Negative Binomial)

*Reference: Acer platanoides.*

| Predictor | Estimate (β) | Std. Error | z-value | p-value |
| --- | --- | --- | --- | --- |
| (Intercept) | 3.4875 | 1.7986 | 1.939 | 0.0525 . |
| Diameter | 0.2901 | 0.2008 | 1.445 | 0.1484 |
| Temperature | 0.0446 | 0.0502 | 0.890 | 0.3735 |
| Humidity | 0.0048 | 0.0140 | 0.340 | 0.7338 |
| Hollows, number | 0.1422 | 0.0619 | 2.299 | 0.0215 * |
| Moss, % | 0.0228 | 0.0064 | 3.564 | <0.001 *** |
| Dead branches, % | -0.0094 | 0.0029 | -3.253 | 0.0011 ** |
| Tree: Alnus glutinosa | -0.9820 | 0.4296 | -2.286 | 0.0223 * |
| Tree: Betula pendula | -1.3214 | 0.4904 | -2.694 | 0.0071 ** |
| Tree: Salix alba | -1.6598 | 0.4529 | -3.664 | 0.0002 *** |
| Tree: Tilia cordata | -0.5377 | 0.2472 | -2.175 | 0.0296 * |

Supplementary Table S5. Random Forest importance

| Variable | %IncMSE | IncNodePurity | Rank |
| --- | --- | --- | --- |
| Diameter | 15.99 | 312691.7 | 1 |
| Temperature | 14.67 | 293643.9 | 2 |
| Tree species | 12.61 | 316280.9 | 3 |
| Humidity | 10.27 | 294014.6 | 4 |
| Moss, % | 7.36 | 191545.8 | 5 |
| Dead branches, % | 5.11 | 182977.3 | 6 |
| Hollows, number | 1.46 | 77310.5 | 7 |

Supplementary Table S6. PDP key nonlinear thresholds

| Factor | Value (X) | Predicted activity (ŷ) | Interpretation |
| --- | --- | --- | --- |
| Temperature | 14.0°C | 110.5 | Baseline activity |
|  | 21.5°C | 122.4 | Beginning of rapid increase |
|  | 22.1°C | 179.6 | Peak activity reached |
|  | 28.5°C | 161.7 | Stabilisation under high temperatures |
| Humidity | 38.0% | 226.0 | Optimal conditions |
|  | 44.8% | 166.7 | Critical decline |
|  | 80.0% | 145.3 | Minimum activity |
| Diameter | 0.03 m | 99.9 | Thin trunks |
|  | 0.38 m | 145.4 | Medium-sized trees |
|  | 0.45 m | 171.7 | Maximum activity reached |
|  | 1.80 m | 185.3 | Plateau of old-growth trees |

Supplementary Table S7. Host vs forage oak comparison (diameter + hollows)

| Parameter | Host Oaks (Median) | Forage Oaks (Median) | W-value | p-value |
| --- | --- | --- | --- | --- |
| Diameter (m) | 1.10 | 0.65 | 266 | < 0.001 |
| Hollows (n) | 3.5 | 0.0 | 129.5 | < 0.0001 |

### **Supplementary Table S8**. An ideal host tree *for Lasius fuliginosus*

| Parameter | Ideal characteristics | Justification (based on the results) |
| --- | --- | --- |
| Tree species | *Quercus robur* (pedunculate oak), less frequently old *Salix alba* or *Populus nigra* | Most frequent and preferred tree species; strong positive association with colony size and percentage of workers with full gasters |
| Trunk diameter (DBH) | 0.7–1.2 m or more (large old trees) | Large diameter positively associated with ant activity; nests are typically located in hollows of old trees |
| Tree condition | Weakened trees with numerous hollows and a moderate proportion of dead branches (20–60%) | Significant positive effect of hollow number (GLMM); optimal dead branch range identified by PDP analysis |
| Moss cover on trunk | High (>20–30%) | Significant positive effect detected in GLMM |
| Distance to forest edge | Close to the forest edge (0–50 m, optimal at ~20–30 m) | Activity and percentage of workers with full gasters were higher near forest edges (PDP analysis) |
| Microclimate | Temperature 20–24°C; air humidity up to 50–60% | Optimal conditions for high activity according to PDP analysis |
| Nest location | Large hollow near the trunk base or within the root zone; carton nest inside | Typical nesting pattern of the species |
| General profile | Large old oak with a basal hollow, partially weakened, growing near a forest edge in a natural or slightly disturbed forest | Conditions providing maximum support for large and active colonies |

### **Supplementary Table S9**. An ideal forage tree for *Lasius fuliginosus*

| Parameter | Ideal characteristics | Justification (based on the results) |
| --- | --- | --- |
| Tree species | *Quercus robur* (oak), also *Acer platanoides*, *Tilia cordata*, or *Betula pendula* | Oak provides the highest percentage of workers with full gasters; other species serve as additional honeydew sources |
| Trunk diameter (DBH) | Medium to large (from 0.5 m and above) | Positive association with the number of ants on trails (PDP and Random Forest analyses) |
| Tree condition | Healthy or slightly weakened, with a well-developed crown and abundant aphid colonies | Does not require numerous hollows; aphid abundance is the main factor |
| Moss / lichen cover | Moderate or low | Moss is more important for nesting trees |
| Distance to forest edge | 0–100 m (optimal up to 50 m) | Activity is higher near forest edges, although foraging trees may occur farther from the nest |
| Microclimate | Warm conditions (22–26°C) and relatively low humidity (up to 45–55%) | Maximum foraging activity according to PDP analysis |
| Position relative to the nest | Within a radius of 20–150 m from the nesting tree | Stable trails usually lead to the nearest rich honeydew sources |
| General profile | Large or medium-sized oak (or another deciduous tree) with abundant aphid populations in the canopy, growing under warm and relatively dry microclimatic conditions near the nest | Provides a high carbohydrate (honeydew) input for the colony |
